# Supplementary material for: Measuring Knowledge of Healthcare Providers on Pediatric Palliative Care with an Online Questionnaire Based on the National Core Curriculum in Italy
Source: MDPI journal article supplement (doi:10.3390/healthcare11131971), 2023-07-07
Supplement: s1 [file s1]

**Measuring perceived, wished and actual knowledge of healthcare providers about pediatric palliative care with an online questionnaire in Italy**

**Supplementary files**

Table of Contents

Table S1. Online questionnaire..... 2

Table S2. Total scores by socio-demographic characteristics of respondents ..... 7

Table S3. Proportion of scores  $\geq 4$  for items of Whished Knowledge scale by professional profile ..8

## Table S1. Online questionnaire

### Rilevazione delle conoscenze in cure palliative pediatriche (CPP) e terapia del dolore (TD)

Sei un medico/psicologo/infermiere che lavora anche o solo in ambito pediatrico?

Rispondi al questionario anonimo che ci servirà a capire quali sono i bisogni formativi in merito alle cure palliative e alla terapia del dolore in pediatria.

Se vuoi ulteriori informazioni sul progetto di ricerca, [clicca qui](#). (entrare alla voce "Ricerca" del menù "Attività").

Il sondaggio fa parte del progetto di ricerca: "Continuità e Complessità in Pediatria", promosso dal Burlo e realizzato in collaborazione con le Aziende Sanitarie del SSR ed il finanziamento della Regione Friuli-Venezia Giulia."(\*)

Per approfondimenti, chiarimenti o dubbi, contatta:

Roberta Vecchi, Cell. 320 43 89 125 | Elisa Zanello, Cell. 320 43 89 142 | E-

mail: [ricerca.continuita@burlo.trieste.it](mailto:ricerca.continuita@burlo.trieste.it)

(\*)Progetto "Continuità delle cure per minori con complessità assistenziale: bisogni e percorsi in Friuli-Venezia Giulia", finanziato con i contributi per la ricerca clinica, traslazionale, di base, epidemiologica e organizzativa, di cui all'articolo 15, comma 2, lettera b), della legge regionale 17/2014. Trasmissione integrazioni, CUP C93C17001400007

**\* campo obbligatorio**

| Quesito                                                                                                                                                                          |
|----------------------------------------------------------------------------------------------------------------------------------------------------------------------------------|
| <b>A. DATI SOCIO - ANAGRAFICI</b>                                                                                                                                                |
| <b>A.1 Sei un uomo o una donna?*</b>                                                                                                                                             |
| <input type="radio"/> M <input type="radio"/> F                                                                                                                                  |
| <b>A.2 Qual è la tua età?*</b>                                                                                                                                                   |
| <input type="radio"/> <30 anni <input type="radio"/> 30-45 anni <input type="radio"/> 46-60 anni <input type="radio"/> >60 anni                                                  |
| <b>A.3 Qual è il tuo profilo professionale?*</b>                                                                                                                                 |
| <input type="radio"/> medico <input type="radio"/> psicologo <input type="radio"/> infermiere <input type="radio"/> altro                                                        |
| <b>A.4 Se sei un medico, indicaci la tua specializzazione:</b>                                                                                                                   |
| <input type="radio"/> oncologia <input type="radio"/> anestesia e rianimazione <input type="radio"/> pediatria <input type="radio"/> cure palliative <input type="radio"/> altro |
| <b>A.5 Se sei un medico e hai risposto altro, descrivi la tua specializzazione:</b>                                                                                              |
| <input type="text"/>                                                                                                                                                             |
| <b>A.6 Se sei uno psicologo, inserisci la tua qualifica:</b>                                                                                                                     |
| <input type="radio"/> psicologo <input type="radio"/> psicoterapeuta <input type="radio"/> altro                                                                                 |
| <b>A.7 Se sei uno psicologo e hai risposto altro, descrivi la tua qualifica (per es. studente in psicologia, tirocinante post laurea)::</b>                                      |
| <input type="text"/>                                                                                                                                                             |
| <b>A.8 Se sei un infermiere, inserisci la tua qualifica:</b>                                                                                                                     |
| <input type="radio"/> infermiere pediatrico <input type="radio"/> infermiere professionale <input type="radio"/> altro                                                           |
| <b>A.9 Se sei un infermiere e hai risposto altro, descrivi la tua qualifica (per es. studente, referente infermieristico)::</b>                                                  |

**A.10 Indicaci la tua sede di lavoro principale (indica l'area):\***

- ☐ Trieste
- ☐ Udine
- ☐ Pordenone
- ☐ Gorizia

**A.11 Quanta parte della tua attività lavorativa riguarda pazienti pediatrici (0-17 anni)?\***

- ☐ 100% ☐ >50% ☐ <50% ☐ 0%

**A.12 Qual è il tuo contesto di lavoro?\***

- ☐ ospedale
- ☐ territorio
- ☐ ente convenzionato
- ☐ ambulatorio MMG
- ☐ ambulatorio PLS

**A.13 Descrivi l'Unità Operativa o il Servizio in cui lavori:****A.14 Qual è la tua anzianità di servizio?\***

- ☐ <5 anni ☐ 5-10 anni ☐ >10 anni

**A.15 Qual è la tua formazione specifica in CP/CPP?\***

- ☐ master in CP
- ☐ master in CPP
- ☐ corsi di perfezionamento in CP
- ☐ corsi di perfezionamento in CPP
- ☐ congressi/seminari
- ☐ nessuna

**A.16 Hai esperienza lavorativa in CP/CPP?\***

- ☐ solo CP ☐ solo CPP ☐ entrambe ☐ nessuna delle due

**B. QUANTO CONOSCI I SEGUENTI TEMI (esprimi la tua valutazione su una scala da 1 a 5, dove 1=per nulla, 2=poco, 3=abbastanza, 4=molto e 5=moltissimo)****B.1 Definizione e filosofia di TD e CPP\***

- ☐ 1 ☐ 2 ☐ 3 ☐ 4 ☐ 5

**B.2 Diritti, normative, legislazione specifica in TD e CPP\***

- ☐ 1 ☐ 2 ☐ 3 ☐ 4 ☐ 5

**B.3 Etica e deontologia in TD e CPP\***

☐ 1 ☐ 2 ☐ 3 ☐ 4 ☐ 5

**B.4 Criteri di eleggibilità per TD e CPP (ovvero le 4 categorie di patologia)\***

☐ 1 ☐ 2 ☐ 3 ☐ 4 ☐ 5

**B.5 Modalità, criteri e metodi per la valutazione del dolore\***

☐ 1 ☐ 2 ☐ 3 ☐ 4 ☒ 5

**B.6 Percorsi assistenziali in TD e CPP e modalità di attivazione\***

☐ 1 ☐ 2 ☐ 3 ☐ 4 ☐ 5

**B.7 Diritto del bambino/a ad essere informato/a\***

☐ 1 ☐ 2 ☐ 3 ☐ 4 ☐ 5

**B.8 Modalità di comunicazione con il bambino/a (per età, sviluppo, consapevolezza, cultura, ...)\***

☐ 1 ☐ 2 ☐ 3 ☐ 4 ☐ 5

**B.9 Modalità di comunicazione con i famigliari (afferenti a diversi contesti socio culturali)\***

☐ 1 ☐ 2 ☐ 3 ☐ 4 ☐ 5

**B.10 Modalità per individuare i bisogni del bambino/a e della famiglia (emotivi, relazionali, spirituali, amicali, scolastici o lavorativi, ...) nel tempo della malattia\***

☐ 1 ☐ 2 ☐ 3 ☐ 4 ☐ 5

**B.11 Bisogni clinici e assistenziali in TD e CPP\***

☐ 1 ☐ 2 ☐ 3 ☐ 4 ☐ 5

**B.12 Interventi per il trattamento del dolore\***

☐ 1 ☐ 2 ☐ 3 ☐ 4 ☐ 5

**B.13 Il concetto di qualità di vita in TD e CPP\***

☐ 1 ☐ 2 ☐ 3 ☐ 4 ☐ 5

**B.14 Modalità per definire un'assistenza personalizzata nell'ottica della qualità di vita\***

☐ 1 ☐ 2 ☐ 3 ☐ 4 ☐ 5

**B.15 Modalità di attivazione della continuità assistenziale tra ospedale e territorio\***

☐ 1 ☐ 2 ☐ 3 ☐ 4 ☐ 5

**B.16 Modalità di transizione dai servizi pediatrici a quelli per l'età adulta\***

☐ 1 ☐ 2 ☐ 3 ☐ 4 ☐ 5

**B.17 Bisogni psicologici e sociali di bambino/a e famiglia nel fine vita\***

☐ 1 ☐ 2 ☐ 3 ☐ 4 ☐ 5

**B.18 Bisogni clinici, sintomi ed emergenze che si presentano nel fine vita\***

☐ 1 ☐ 2 ☐ 3 ☐ 4 ☐ 5

**B.19 Dilemmi etici nell'inguaribilità e nel fine vita\***

☐ 1 ☐ 2 ☐ 3 ☐ 4 ☐ 5

**B.20 Lutto\***

☐ 1 ☐ 2 ☐ 3 ☐ 4 ☐ 5

**C. QUANTO VORRESTI MIGLIORARE LA TUA CONOSCENZA SUI SEGUENTI TEMI (esprimi la tua valutazione su una scala da 1 a 5, dove 1=per nulla, 2=poco, 3=abbastanza, 4=molto e 5=moltissimo)**

**C.1 Valutazione di bambino e famiglia per l'accesso alle rete di CPP e TDP\***

☐ 1 ☐ 2 ☐ 3 ☐ 4 ☐ 5

**C.2 Accoglienza di bambino e famiglia nella rete di CPP e TDP\***

☐ 1 ☐ 2 ☐ 3 ☐ 4 ☐ 5

**C.3 Presa in carico di pazienti e famiglie nei diversi setting assistenziali della rete di CPP e TDP\***

☐ 1 ☐ 2 ☐ 3 ☐ 4 ☐ 5

**C.4 Lavoro in equipe\***

☐ 1 ☐ 2 ☐ 3 ☐ 4 ☐ 5

**C.5 Gestione del sè\***

☐ 1 ☐ 2 ☐ 3 ☐ 4 ☐ 5

**C.6 Attivazione e gestione di un centro di riferimento di CPP e TDP\***

☐ 1 ☐ 2 ☐ 3 ☐ 4 ☐ 5

**C.7 Formazione in CPP e TDP\***

☐ 1 ☐ 2 ☐ 3 ☐ 4 ☐ 5

**C.8 Ricerca in CPP e TDP\***

☐ 1 ☐ 2 ☐ 3 ☐ 4 ☐ 5

**D. QUAL E' LA RISPOSTA CORRETTA? (È possibile indicare solo una risposta per domanda)**

**D.1 Cosa comprende il quadro normativo che disciplina le CPP e TD? \***

**D.2 Quali sono le patologie del bambino eleggibili alla CPP?\***

**D.3 In quali casi il bambino ha diritto ad essere informato sulla sua prognosi?\***

**D.4 Il protocollo di Buckman è:\***

**D.5 Cosa è necessario per una presa in carico multi-professionale della famiglia del piccolo paziente?\***

**D.6 Quando muore un bambino siamo di fronte a:\***

- ☐ un lutto inelaborabile ☐ un lutto traumatico ☐ un lutto difficile ☐ un lutto normale

**D.7 La differenza tra sedazione palliativa e sedazione terminale riguarda:\***

**D.8 L'attivazione della continuità assistenziale è subordinata a:\***

**D.9 Qual è il sintomo più frequente nel fine vita del bambino con patologia non oncologica?\***

- ☐ il dolore ☐ le difficoltà di alimentazione ☐ la perdita della motilità autonoma ☐ la fatica e i disturbi respiratori

**Se hai piacere, indicaci i tuoi suggerimenti:**

Conferma che non sei un bot risolvendo questa semplice operazione :  $6 + 7 =$

Invia le risposte

**Table S2. Total scores by socio-demographic characteristics of respondents**

| Socio-demographic variables                                              | Perceived Knowledge |                  | Wished Knowledge |              | Actual Knowledge |       |
|--------------------------------------------------------------------------|---------------------|------------------|------------------|--------------|------------------|-------|
|                                                                          | Median (IQR)        | p                | Median (IQR)     | p            | Median (IQR)     | p     |
| <b>Gender</b>                                                            |                     | 0.803            |                  | 0.789        |                  | 0.467 |
| Male, N=15                                                               | 58.0 (46.0-52.0)    |                  | 29.0 (24.0-39.0) |              | 6.0 (4.0-7.0)    |       |
| Female, N=90                                                             | 52.0 (43.0-66.0)    |                  | 28.0 (24.0-34.0) |              | 6.0 (5.0-7.0)    |       |
| <b>Age class</b>                                                         |                     | 0.833            |                  | 0.642        |                  | 0.357 |
| ≤ 30, N=12                                                               | 50.0 (38.0-63.5)    |                  | 32.0 (24.0-35.5) |              | 7.0 (4.5-7.5)    |       |
| 31-45, N=36                                                              | 56.0 (43.5-66.0)    |                  | 28.5 (25.0-37.5) |              | 5.5 (4.0-7.0)    |       |
| 46-60, N=49                                                              | 50.0 (44.0-65.0)    |                  | 28.0 (23.0-32.0) |              | 6.0 (5.0-7.0)    |       |
| ≥ 61, N=8                                                                | 55.0 (46.0-67.5)    |                  | 25.0 (23.5-32.0) |              | 6.5 (5.5-7.0)    |       |
| <b>Amount of work with pediatric patients</b>                            |                     | 0.867            |                  | 0.362        |                  | 0.281 |
| None, N=18                                                               | 50.0 (38.0-68.0)    |                  | 27.5 (22.0-32.0) |              | 7.0 (6.0-7.0)    |       |
| < 50%, N=15                                                              | 57.0 (46.0-71.0)    |                  | 27.0 (24.0-31.0) |              | 6.0 (5.0-7.0)    |       |
| > 50% and < 100%, N=17                                                   | 54.0 (44.0-67.0)    |                  | 27.0 (25.0-37.0) |              | 6.0 (5.0-7.0)    |       |
| 100%, N=55                                                               | 52.0 (44.0-60.0)    |                  | 31.0 (24.0-36.0) |              | 6.0 (5.0-7.0)    |       |
| <b>Primary work setting</b>                                              |                     | 0.234            |                  | <b>0.043</b> |                  | 0.676 |
| Hospital and community, N=6                                              | 63.0 (54.0-85.0)    |                  | 25.0 (23.0-28.0) |              | 7.0 (6.0-8.0)    |       |
| Hospital, N=57                                                           | 53.0 (44.0-64.0)    |                  | 31.0 (25.0-38.0) |              | 6.0 (5.0-7.0)    |       |
| Community, N=21                                                          | 50.0 (45.0-70.0)    |                  | 32.0 (27.0-33.0) |              | 6.0 (5.0-7.0)    |       |
| Other, N=21                                                              | 50.0 (60.0-40.0)    |                  | 24.0 (23.0-29.0) |              | 7.0 (4.0-7.0)    |       |
| <b>Length of service</b>                                                 |                     | 0.334            |                  | <b>0.027</b> |                  | 0.615 |
| < 5 years, N=19                                                          | 54.0 (47.0-67.0)    |                  | 25.0 (16.5-28.5) |              | 6.0 (4.0-7.0)    |       |
| 5-10 years, N=12                                                         | 46.5 (37.0-57.0)    |                  | 30.0 (25.0-37.0) |              | 4.5 (4.0-7.5)    |       |
| > 10 years, N=74                                                         | 52.0 (44.0-66.0)    |                  | 29.0 (24.0-35.0) |              | 6.0 (5.0-7.0)    |       |
| <b>Prior education in PC/PPC</b>                                         |                     | <b>&lt;0.001</b> |                  | 0.761        |                  | 0.297 |
| None, N=35                                                               | 46.0 (36.0-55.0)    |                  | 26.0 (22.0-37.0) |              | 6.0 (4.0-7.0)    |       |
| Congresses/seminars, N=63                                                | 54.0 (47.0-67.0)    |                  | 30.0 (25.0-35.0) |              | 6.0 (5.0-7.0)    |       |
| Advanced courses in PC/PPC (with or without congresses/seminars), N=2    | 82.0 (65.0-84.0)    |                  | 28.0 (24.0-29.0) |              | 5.0 (5.0-6.0)    |       |
| Master in PC (with or without congresses/seminars/advanced courses), N=4 | 74.0 (53.0-88.0)    |                  | 29.5 (22.0-33.0) |              | 6.5 (5.5-7.5)    |       |
| <b>Prior work experience in PC/PPC</b>                                   |                     | <b>&lt;0.001</b> |                  | 0.085        |                  | 0.128 |
| None, N=62                                                               | 48.0 (41.0-55.0)    |                  | 28.5 (23.0-33.0) |              | 6.0 (4.0-7.0)    |       |
| Only PC, N=18                                                            | 57.5 (40.0-66.0)    |                  | 27.0 (23.0-30.0) |              | 7.0 (5.0-8.0)    |       |
| Only PPC, N=15                                                           | 59.0 (50.0-73.0)    |                  | 34.0 (27.0-38.0) |              | 7.0 (5.0-8.0)    |       |
| Both, N=10                                                               | 75.0 (66.0-80.0)    |                  | 28.5 (26.0-33.0) |              | 6.0 (6.0-7.0)    |       |

Abbreviations: PC = Palliative Care; PPC = Pediatric Palliative Care

**Table S3. Proportion of scores  $\geq 4$  for items of Whished Knowledge scale by professional profile**

| Wished Knowledge                             | Total<br>N=102 | Physicians<br>N=15 | Nurses<br>N=56 | Psychologists<br>N=31 | p            |
|----------------------------------------------|----------------|--------------------|----------------|-----------------------|--------------|
| Evaluation for PPC/PT network access, N (%)  | 63 (61.8)      | 17 (54.8)          | 36 (64.3)      | 10 (66.7)             | 0.627        |
| Reception in the PPC/PT network, N (%)       | 59 (57.8)      | 15 (39.5)          | 36 (64.3)      | 8 (53.3)              | 0.330        |
| Charge in the PPC/PT network settings, N (%) | 60 (58.8)      | 17 (54.8)          | 35 (62.5)      | 8 (53.3)              | 0.704        |
| Team work, N (%)                             | 67 (65.7)      | 21 (67.7)          | 37 (66.1)      | 9 (60.0)              | 0.871        |
| Management of self, N (%)                    | 56 (54.9)      | 16 (51.6)          | 31 (55.4)      | 9 (60.0)              | 0.862        |
| PPC/PT Reference center management, N (%)    | 51 (50.0)      | 11 (35.5)          | 32 (57.1)      | 8 (53.3)              | 0.148        |
| Training on PPC/PT, N (%)                    | 60 (58.8)      | 15 (39.5)          | 38 (67.9)      | 7 (46.7)              | 0.123        |
| Research on PPC/PT, N (%)                    | 43 (42.1)      | 7 (22.5)           | 31 (55.4)      | 5 (33.3)              | <b>0.009</b> |

Abbreviations: PC = Palliative Care; PPC = Pediatric Palliative Care
